# Supplementary material for: Wafer-scale MoS2 with water-vapor assisted showerhead MOCVD
Source: PubMed Central journal article supplement — Nanoscale Adv. 2022 Sep 2;4(20):4391–401. doi: 10.1039/d2na00409g (PMC9552924; doi:10.1039/d2na00409g), 2022-09-02
Supplement: NA-004-D2NA00409G-s001.pdf [file NA-004-D2NA00409G-s001.pdf]

Supplementary to  
Wafer-scale MoS<sub>2</sub> with water-vapor assisted  
showerhead MOCVD

Michal Macha<sup>1\*</sup>, Hyun Goo Ji<sup>2</sup>, Mukesh Tripathi<sup>2</sup>, Yanfei Zhao<sup>2</sup>, Mukeshchand Thakur<sup>1</sup>, Jing Zhang<sup>2,3</sup>, Andras Kis<sup>2</sup> and Aleksandra Radenovic<sup>1\*</sup>

<sup>1</sup>Laboratory of Nanoscale Biology, Institute of Bioengineering, .

<sup>2</sup>Laboratory of Nanoscale Electronics and Structures, Electrical Engineering Institute and Institute of Materials Science, .

<sup>3</sup>current address: State Key Laboratory of Superlattices and Microstructures, Institute of Semiconductors, Chinese Academy of Sciences, Beijing 100083, China.

\* michal.macha@epfl.ch, aleksandra.radenovic@epfl.ch.

## List of Figures

|   |                                                                                |   |
|---|--------------------------------------------------------------------------------|---|
| 1 | MOCVD growth process flow . . . . .                                            | 3 |
| 2 | Microscopic uniformity check . . . . .                                         | 4 |
| 3 | Detailed Raman spectra analysis of showerhead-grown MoS <sub>2</sub> . . . . . | 5 |
| 4 | Carbon Raman spectra . . . . .                                                 | 5 |
| 5 | Mo 3d and S2p XPS peaks . . . . .                                              | 6 |
| 6 | E-beam dose test and defect concentration . . . . .                            | 7 |

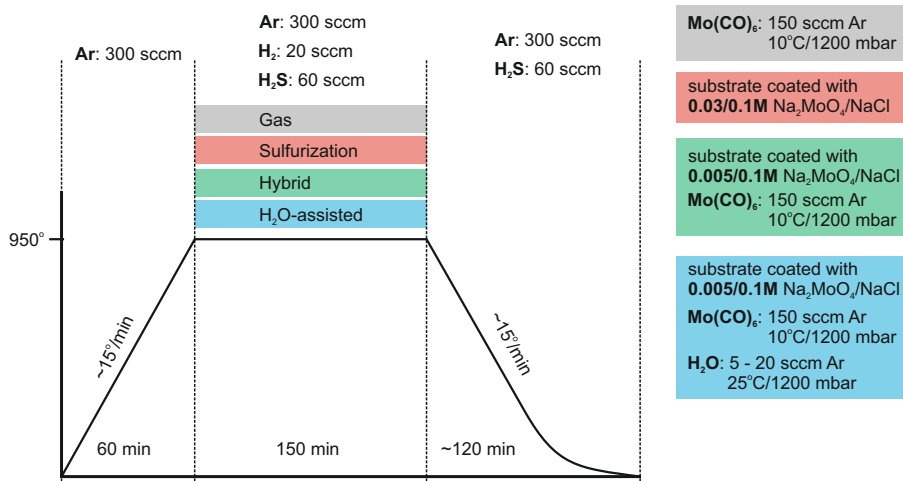

**Fig. 1** The process flow of each investigated growth method. All growth were done at the 830 mbar pressure and at ambient flow of 300 sccm Ar during heating, 300 sccm Ar, 20 sccm H<sub>2</sub> and 60 sccm H<sub>2</sub>S during growth step and 300 sccm Ar with 60 sccm H<sub>2</sub>S during cooling.

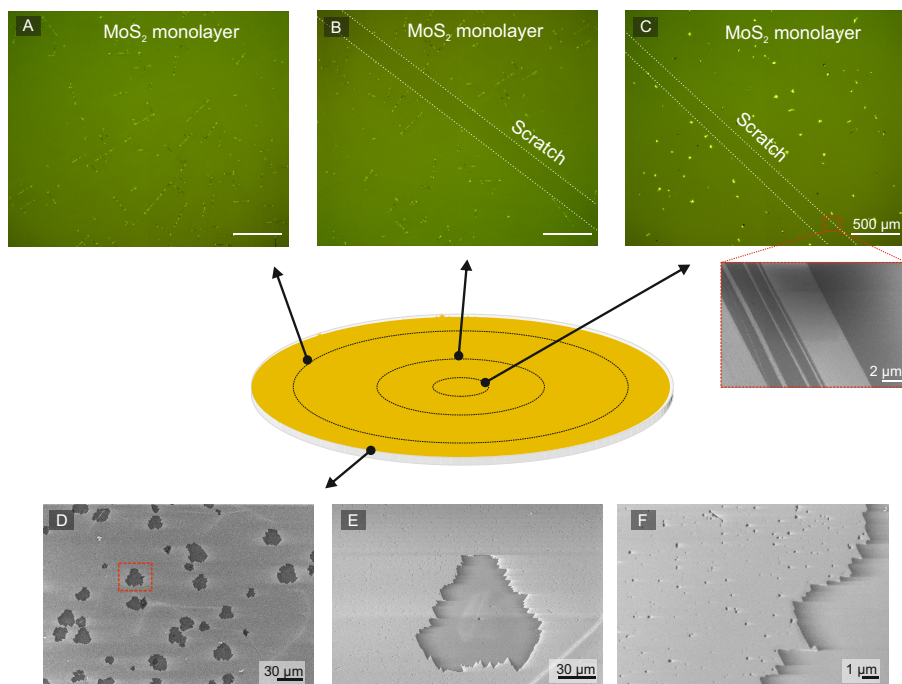

**Fig. 2** Sets of optical (A-C) and scanning electron microscope (SEM) (D-F) images taken from marked, arbitrary wafer locations of the material synthesized with H<sub>2</sub>O-assisted growth method. Majority of the substrate area is covered with monolayer film occasionally showing secondary layer contrast (white spots on panels A-C). Inset on panel C shows a SEM image of the scratch edge. Single crystals can be found by the edge of the substrate and are shown on panel D. Panels E and F depict the incremental magnification of the single crystal MoS<sub>2</sub> flake.

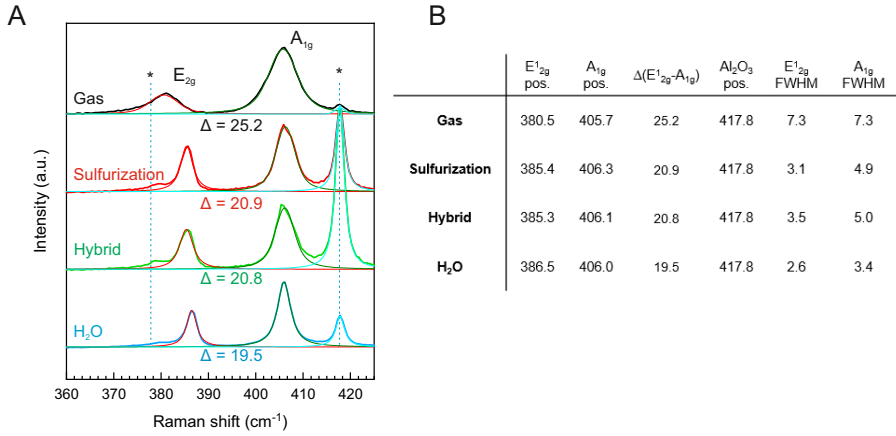

**Fig. 3** A detailed look at typical MoS<sub>2</sub> Raman peaks taken at monolayer locations of MoS<sub>2</sub> synthesized with gas-phase (black), sulfurization (red), hybrid (green) and H<sub>2</sub>O assisted (blue) method (A) with detailed peak positions. Positions marked with \* represent sapphire substrate Raman peaks. (B) Comparison of MoS<sub>2</sub> properties and their significant improvement for water-assisted growth method.

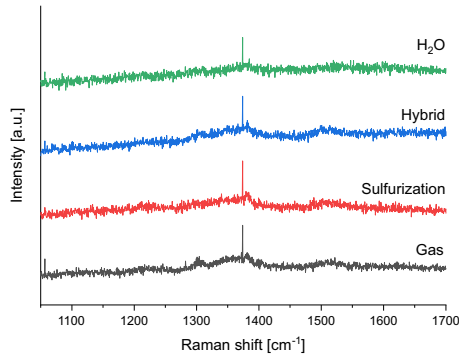

**Fig. 4** Raman spectra of all growth methods show no or trace presence of carbon peaks occurring at 1340 cm<sup>-1</sup> and 1580 cm<sup>-1</sup>. This measurement indicates no detectable carbon deposition on MoS<sub>2</sub>.

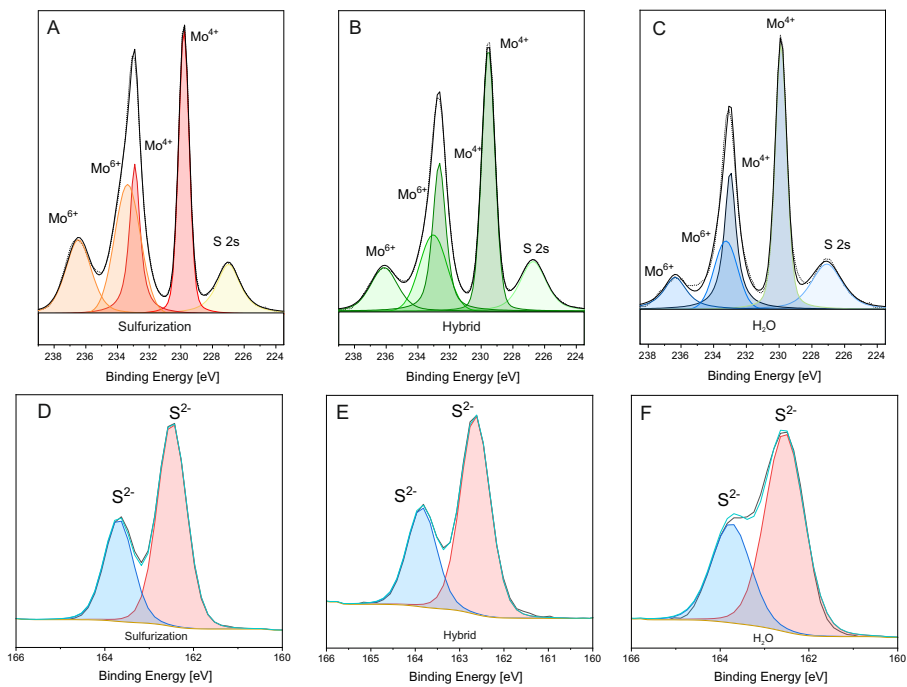

**Fig. 5** Analysis of Mo 3d XPS peaks and its intensities for sulfurization (A), hybrid (B) and H<sub>2</sub>O (C) growth methods corroborates a decrease in residual molybdenum oxides. S 2p peaks of monolayer MoS<sub>2</sub> synthesized with sulfurization (E), hybrid (F) and H<sub>2</sub>O assisted (G) growth methods.

| Sample                | MoOx %          | MoS2 %           | Mo : S         | Na %            |
|-----------------------|-----------------|------------------|----------------|-----------------|
| <b>Sulfurization</b>  | 54.99 $\pm$ 2.4 | 45.00 $\pm$ 2.4  | 2.22 $\pm$ 0.1 | 11.58 $\pm$ 0.7 |
| <b>Hybrid</b>         | 31.32 $\pm$ 7.4 | 68.675 $\pm$ 7.4 | 6.17 $\pm$ 1.1 | 0.43 $\pm$ 0.4  |
| <b>H<sub>2</sub>O</b> | 37.58 $\pm$ 0.9 | 62.41 $\pm$ 0.9  | 3.38 $\pm$ 0.5 | 0.42 $\pm$ 0.4  |

**Table 1** Average atomic ratios taken from 3 substrates synthesized with each, consecutive growth method along with oxide and sodium content.

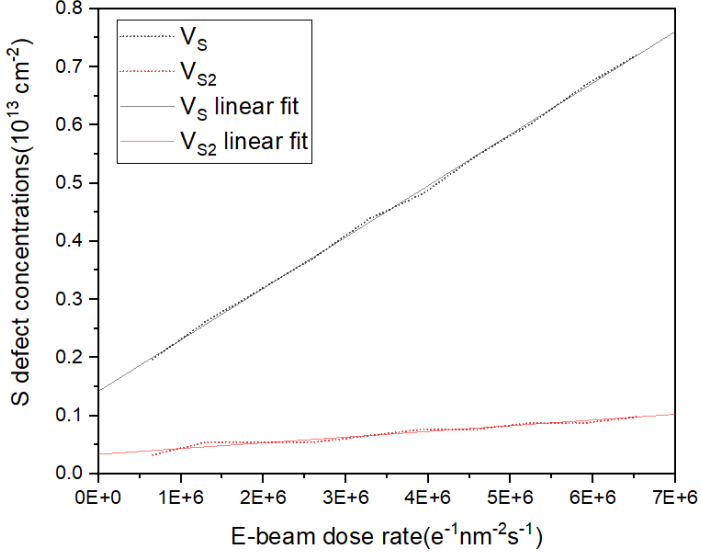

**Fig. 6** The general defect density was calculated using a E-beam dose rate test and remains at  $1.4 \times 10^{13}$  single sulfur ( $V_S$ ) vacancies per  $\text{cm}^2$  and  $0.3 \times 10^{13}$  double sulfur defects ( $V_{S2}$ ) per  $\text{cm}^2$ .
